# Supplementary material for: Potential drug-drug interactions and their risk factors in pediatric patients admitted to the emergency department of a tertiary care hospital in Mexico
Source: PubMed Central journal article supplement (PMC5755936; doi:10.1371/journal.pone.0190882), 2018-01-05
Supplement: pone.0190882.s006.pdf [file pone.0190882.s006.pdf]

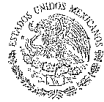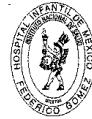

México, D.F., a 7 de Diciembre de 2016

DG/1000/ **1087** /2016

Dra. Olga Magdala Morales Ríos  
Departamento de Evaluación y Análisis de Medicamentos  
Presente

Informo a usted, que los Comités de Investigación, Ética y Bioseguridad, después de haber revisado su protocolo **HIM 2017-008** "Estudio fármaco epidemiológico de potenciales interacciones fármaco-fármaco en niños hospitalizados en un Departamento de Urgencias de un Hospital Pediátrico de tercer nivel en México", han emitido el dictamen de:

**APROBADO**

En los términos y condiciones señalados por dichos Comités. Por lo anterior, se autoriza su desarrollo.

Atentamente

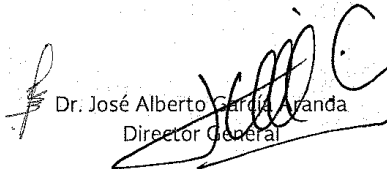  
Dr. José Alberto García Ayanda  
Director General

Con copia:  
Lic. Martha Reynoso Robles. Jefa del Departamento Auxiliar Administrativo.

JAGA/JGE/JGO/ash

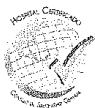

INSTITUTO NACIONAL DE SALUD AFILIADO A LA UNAM

DR. MÁRQUEZ 162, COL. DOCTORES. DEL. CUAUHTÉMOC, C.P. 06720 MÉXICO D.F.  
CONMUTADOR: 5228-9917 EXT. 4315 Y 4100  
[www.himfg.edu.mx](http://www.himfg.edu.mx)
